# Supplementary material
Source: MDPI journal article supplement (https://www.mdpi.com/2674-0311/3/1/2)
Supplement: s1 [file s1]

Archive with 1 entries (1 files):
- dietetics-2768334-supplementary.pdf
