# Supplementary material
Source: MDPI journal article supplement (https://www.mdpi.com/2674-0311/3/1/2)

Sample 1

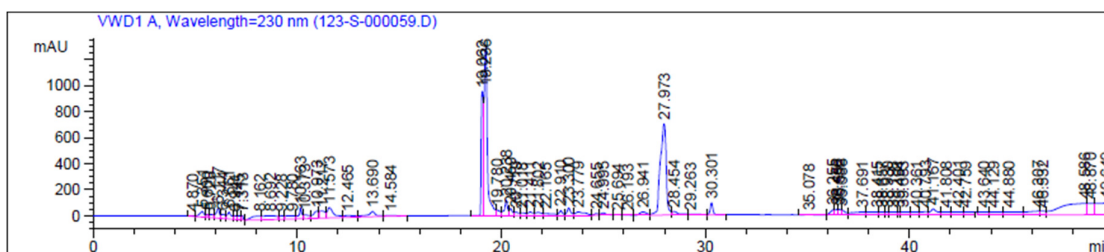

Sample 2

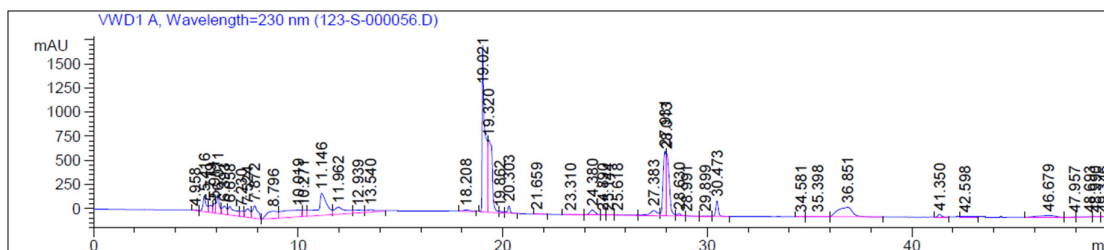

Sample 3

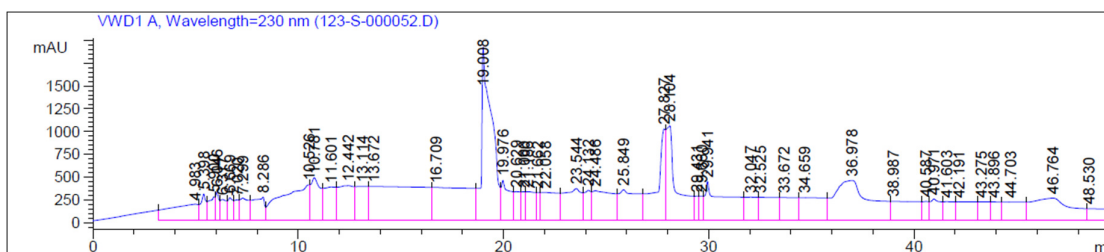

Sample 4

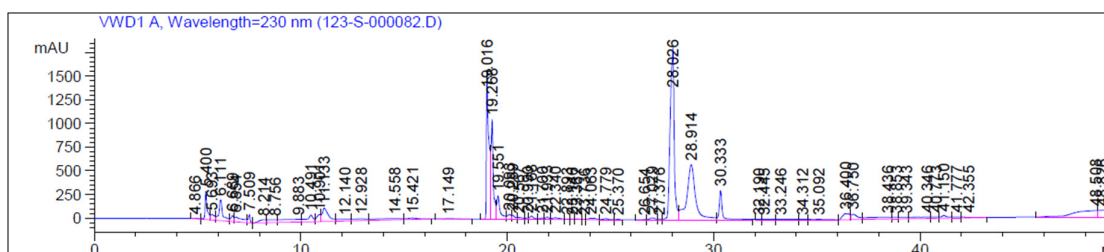

Sample 5

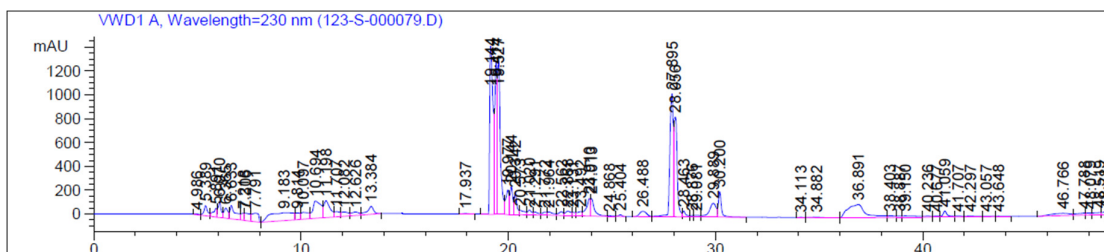

Sample 6

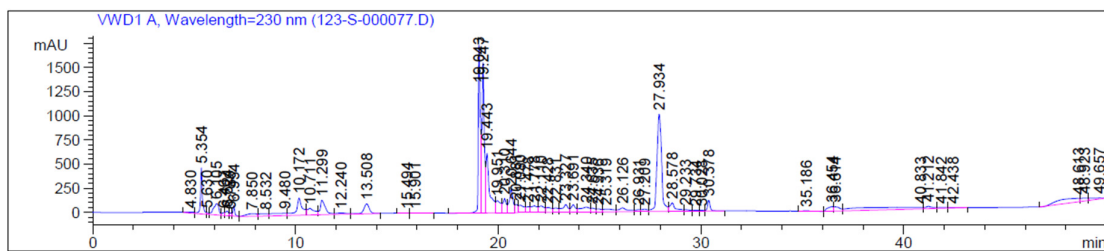

Sample 7

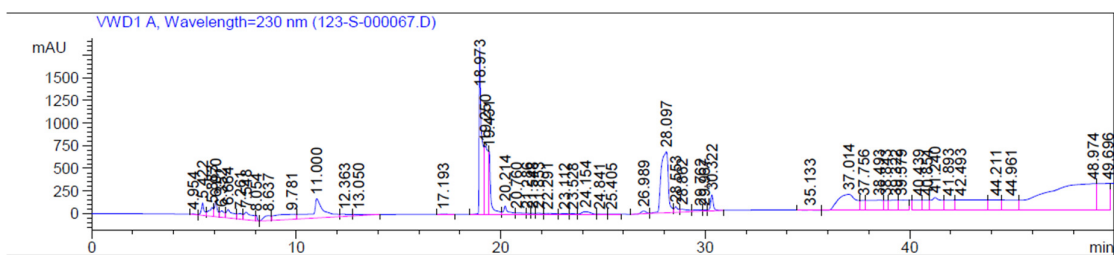

Sample 8

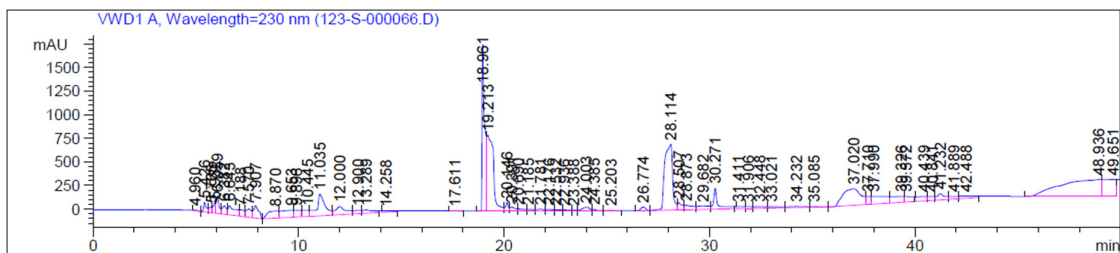

Sample 9

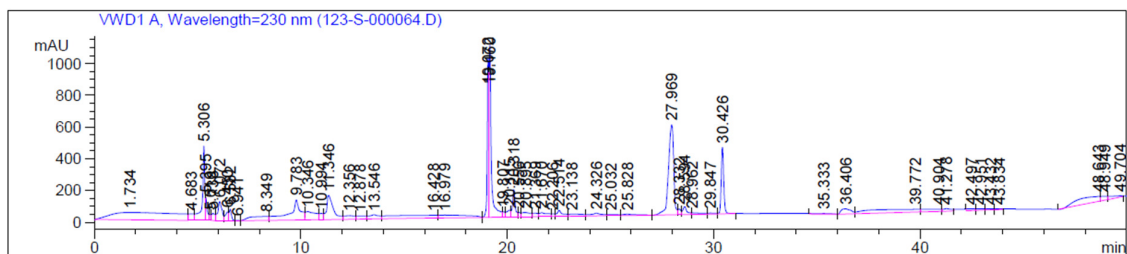

Sample 10

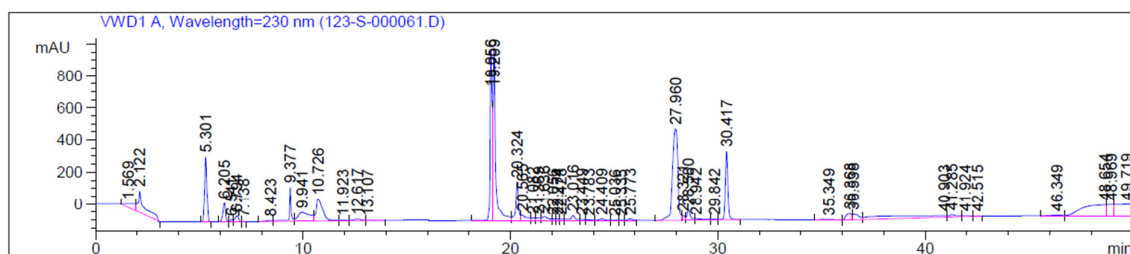

Sample 11

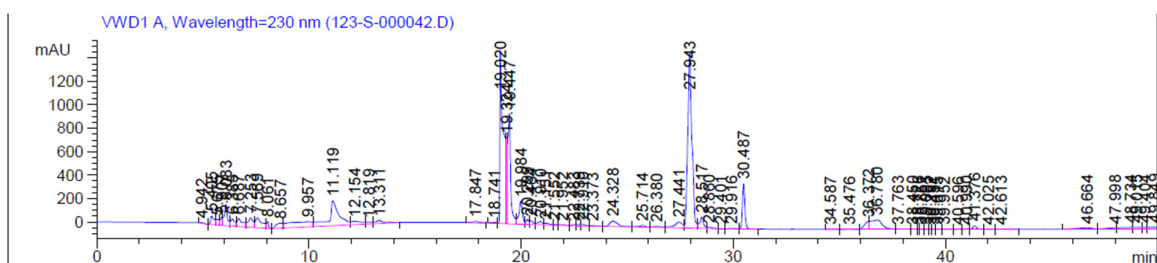

Sample 12

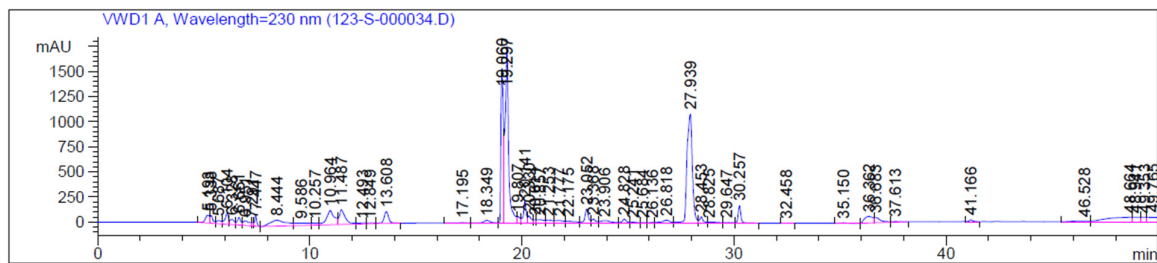

Standard A-b lac

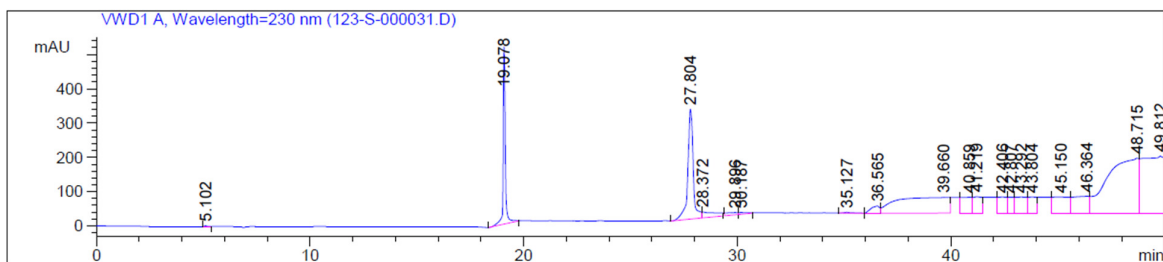

Supplement: s1 [file s1]
